# Supplementary material
Source: PubMed Central journal article supplement (PMC6937588)

## SUPPORTING INFORMATION LEGENDS

**Figure S1. JAK/STAT and AMPK signaling pathways in ESCs change extensively in response to aging.** (A) JAK/STAT and (B) AMPK pathway gene expression perturbations in young vs aged mouse epidermal stem cells from dataset GSE84511. Each node represents a set of genes and the color coding reflects gene expression changes within the node. Wiring diagrams generated using the Pathview and GAGE bioconductor package with 5% FDR (BH).

**Figure S2. Recombinant mouse IL-15 treatment reduces hallmarks of senescence in skin without impacting T-cells.** (A) Cytochrome c oxidase activity measured on Day 42 intact skin epidermal lysates.  $n = 4-6$  mice per group. (B) Representative immunofluorescent images of epidermal and dermal HMGB1 and Lamin B1 staining of young control (Young PBS), old control (Old PBS) and old rmIL-15 (Old rmIL-15) treated intact skin taken during wound surgery and (C, D) quantification of images from (A).  $n = 4-8$  mice per group. (E) Spleen weights of mice from each treatment group normalized to individual body weights.  $n = 4-6$  mice per group. (F) Representative micrographs of epidermal CD3 staining of young control, old control, and old rmIL-15 intact skin taken during wound surgery after 33 days of treatment and quantification.  $n = 4-6$  mice per group. (G) Flow cytometry analysis of whole blood CD3<sup>+</sup>/CD8<sup>+</sup> cells acquired after 31 days of treatment in uninjured mice.  $n = 4-6$  mice per group. Dashed line denotes epidermis. Data are mean $\pm$ SEM. \*Significantly different ( $p < 0.05$ ) compared to Young PBS. #Significantly different ( $p < 0.05$ ) compared to Old PBS. NS, non-significant ( $p > 0.05$ ).

**Figure S3. Recombinant IL-15 therapy in young mice augments wound healing and alters STAT3 signaling.** (A) Representative images of wound healing progress and (B) quantification of wound closure over time in control (Young PBS) and rmIL-15 treated (Young rmIL-15) young mice. Dashed white line indicates wound margin. Scale bar = 5 mm. (C) Final wound closure at time of sacrifice on day 9 expressed as a proportion of the original wound area. (D) Wound closure rate per day determined by the average slope of best fit lines. (E) Projected time for full wound closure based on wound closure rate calculated in (D).  $n = 8-11$  mice per group for A-E data. (F) Representative images of pSTAT3<sup>Y705</sup> immunofluorescent staining in intact skin collected during wound surgery and (G) quantification in the indicated treatment groups. (H) Representative immunofluorescent images of pSTAT3<sup>S727</sup> staining of intact skin collected during wound surgery and (I) quantification.  $n = 3$  mice per group. Dashed line denotes epidermis. Data are mean $\pm$ SEM. \*Significantly different ( $p < 0.05$ ) relative to Young PBS.

**Figure S4. Neutralization of IL-15 in exercising mice prevents the rescue of cellular senescence in aged skin.** (A) Representative images of epidermal and dermal HMGB1 and Lamin B1 immunofluorescent staining of young control (Young SED), old control (Old SED) and old rmIL-15 (Old rmIL-15) treated intact skin after 33 days of treatment. (B) Quantification of HMGB1 and (C) Lamin B1 images from (A).  $n = 3-6$  mice per group. (D) Epidermal mRNA expression of the senescence markers p21 (Cdkn1a) and p16ink4a in each treatment group as a fold of young control mice.  $n = 5-7$  mice per group. Dashed line denotes epidermis. Data are mean $\pm$ SEM; \*Significantly different ( $p < 0.05$ ) versus Young SED mice. #Significantly different ( $p < 0.05$ ) relative to Old SED mice. °Significantly different ( $p < 0.05$ ) compared to Old EX mice. NS, non-significant ( $p > 0.05$ ).



A

Day 42 Intact Skin

Young PBS  
 Old PBS  
 Old mL-15

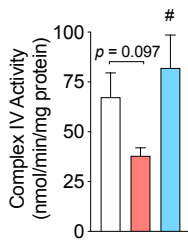

B

Day 33 Intact skin

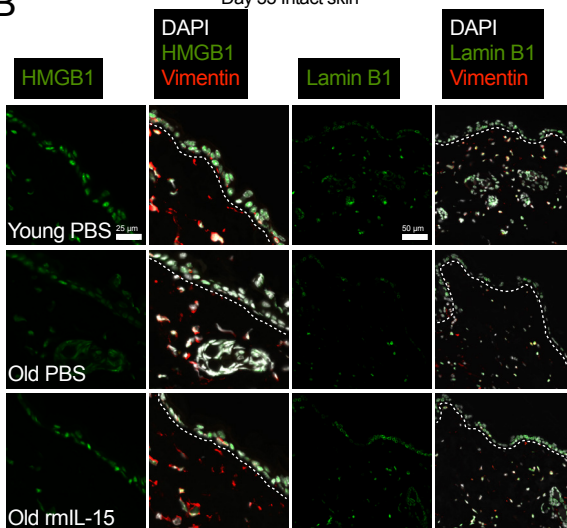

C

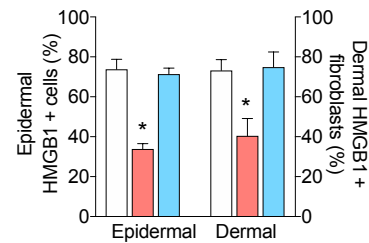

D

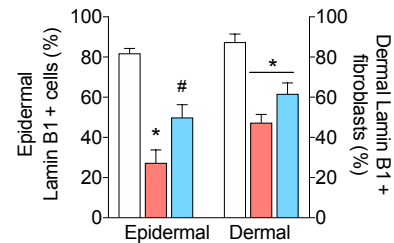

G

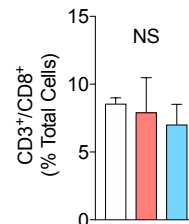

E

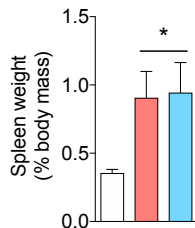

F

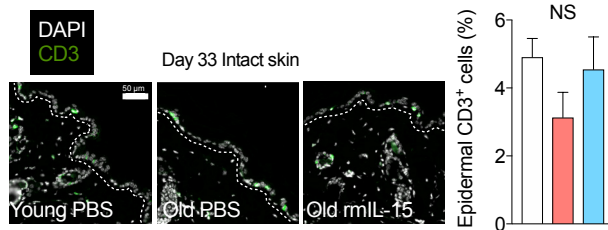

A

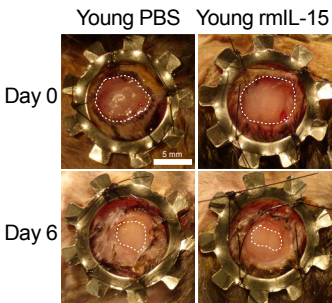

B

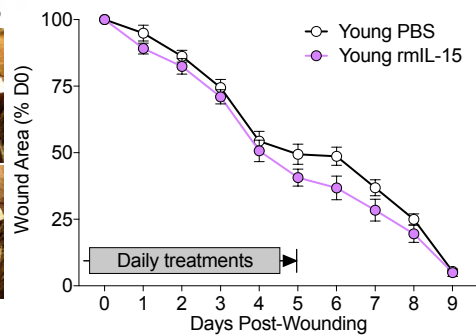

C

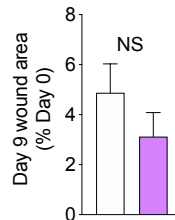

D

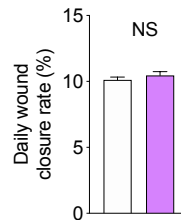

E

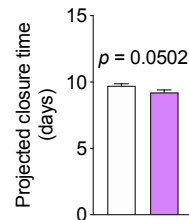

F

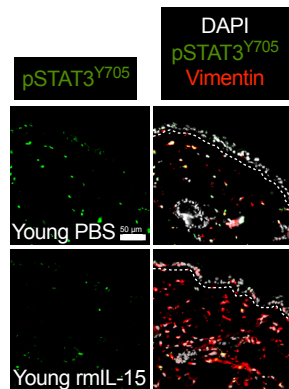

G

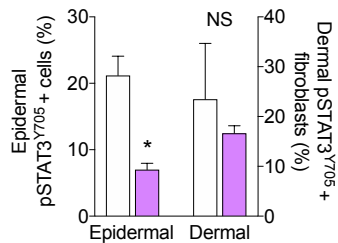

H

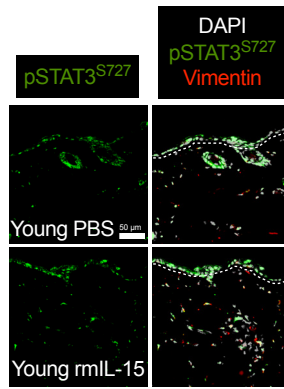

I

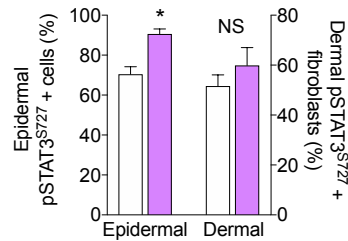

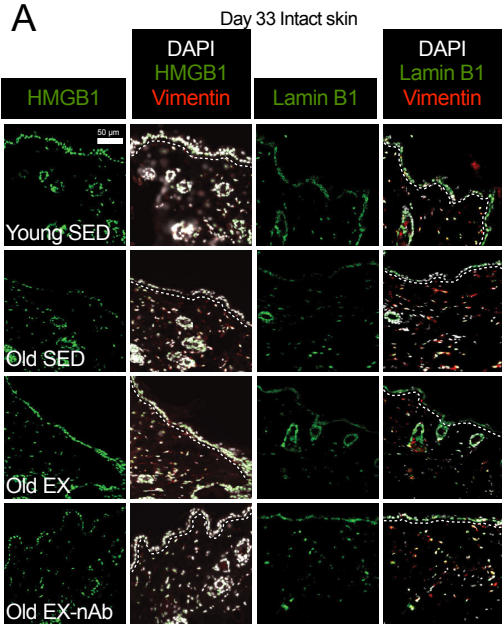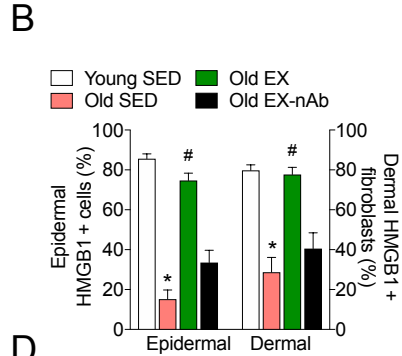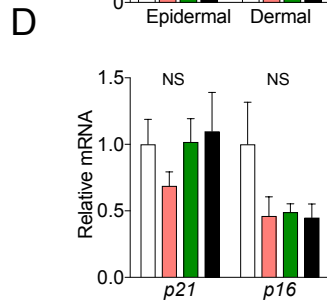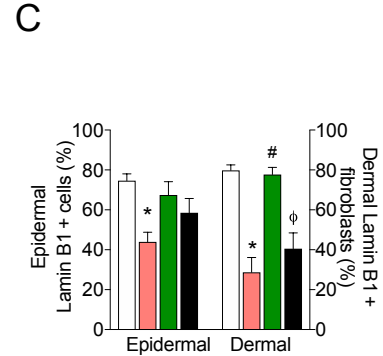

Supplement: supp_RA119.010740_155351_2_supp_432191_q19y3d.pdf [file supp_RA119.010740_155351_2_supp_432191_q19y3d.pdf]
